# Supplementary material for: Goat anti-rabbit IgG conjugated fluorescent dye-doped silica nanoparticles for human breast carcinoma cell recognition
Source: Royal Society of Chemistry journal article supplement (doi:10.1039/c3an01654d), 2013-01-01
Supplement: c3an01654d.pdf [file c3an01654d.pdf]

## Electronic supplementary information

Goat anti-rabbit IgG conjugated fluorescent dye-doped silica nanoparticles for human breast carcinoma cells recognition

Minyan Chen, Zezhong Chen, Lingling Wu, Hongwu Tang\*, Daiwen Pang

To whom correspondence should be addressed. Prof. Hong-Wu Tang, E-mail:

hwtang@whu.edu.cn (H.-W. T.), Tel: 86-27-68756759, Fax: 86-27-68754685.

\*Corresponding author:

*Key Laboratory of Analytical Chemistry for Biology and Medicine (Ministry of Education), College of Chemistry and Molecular Sciences, Research Center for Nanobiology and Nanomedicine (MOE 985 Innovative Platform), Wuhan Institute of Biotechnology, and State Key Laboratory of Virology, Wuhan University, Wuhan, 430072, P. R. China.*

*hwtang@whu.edu.cn*

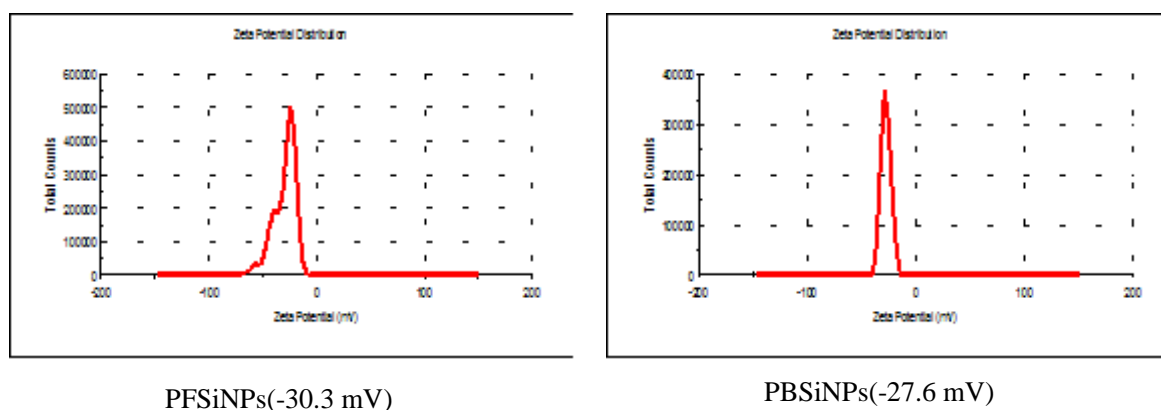

**Fig. S1** Zeta potential of PFSiNPs and PBSiNPs.

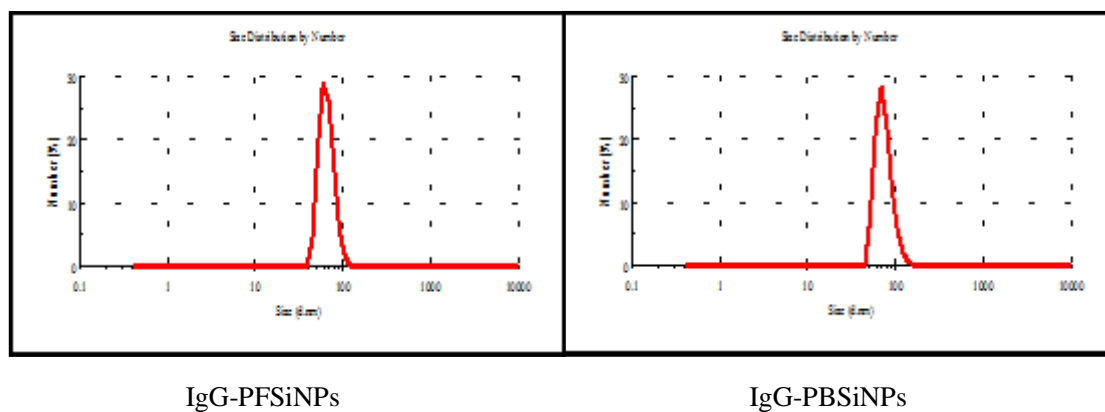

**Fig. S2** Hydrodynamic diameter distribution of PFSiNPs and PBSiNPs conjugated with IgG.

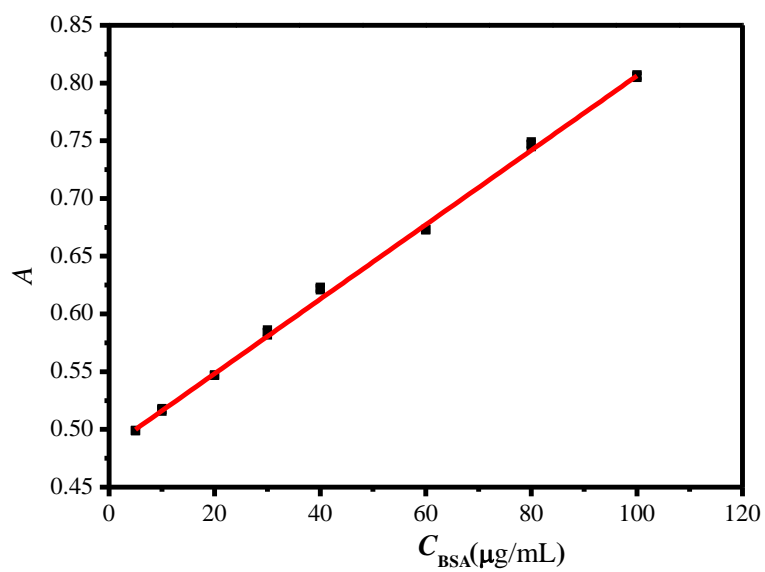

Fig. S3 Changes of absorbance with the amount of BSA added into 1 mL 3.0 mg/mL Coomassie Brilliant Blue G-250 solution in 0.01 M PBS buffer.
